# Supplementary material for: Pt-decorated phosphorene as a propitious room temperature VOC gas sensor for sensitive and selective detection of alcohols
Source: Royal Society of Chemistry journal article supplement (doi:10.1039/d1tc01510a), 2021-01-01
Supplement: d1tc01510a1.pdf [file d1tc01510a1.pdf]

# **Pt-decorated Phosphorene as a Propitious Room Temperature VOCs Gas Sensor for Sensitive and Selective Detection of Alcohols**

Aref Aasi<sup>a</sup>, Sadegh Mehdi Aghaei<sup>a</sup>, and Balaji Panchapakesan<sup>a\*</sup>

<sup>a</sup>Small Systems Laboratory, Department of Mechanical Engineering, Worcester Polytechnic  
Institute, Worcester, Massachusetts 01609, United States

Table S 1. The adsorption energy of the different number of Platinum on the pristine Phosphorene surface.

| Number of Pt           | 1     | 2     | 3     | 4     |
|------------------------|-------|-------|-------|-------|
| Adsorption energy (eV) | -5.84 | -3.16 | -2.97 | -2.55 |

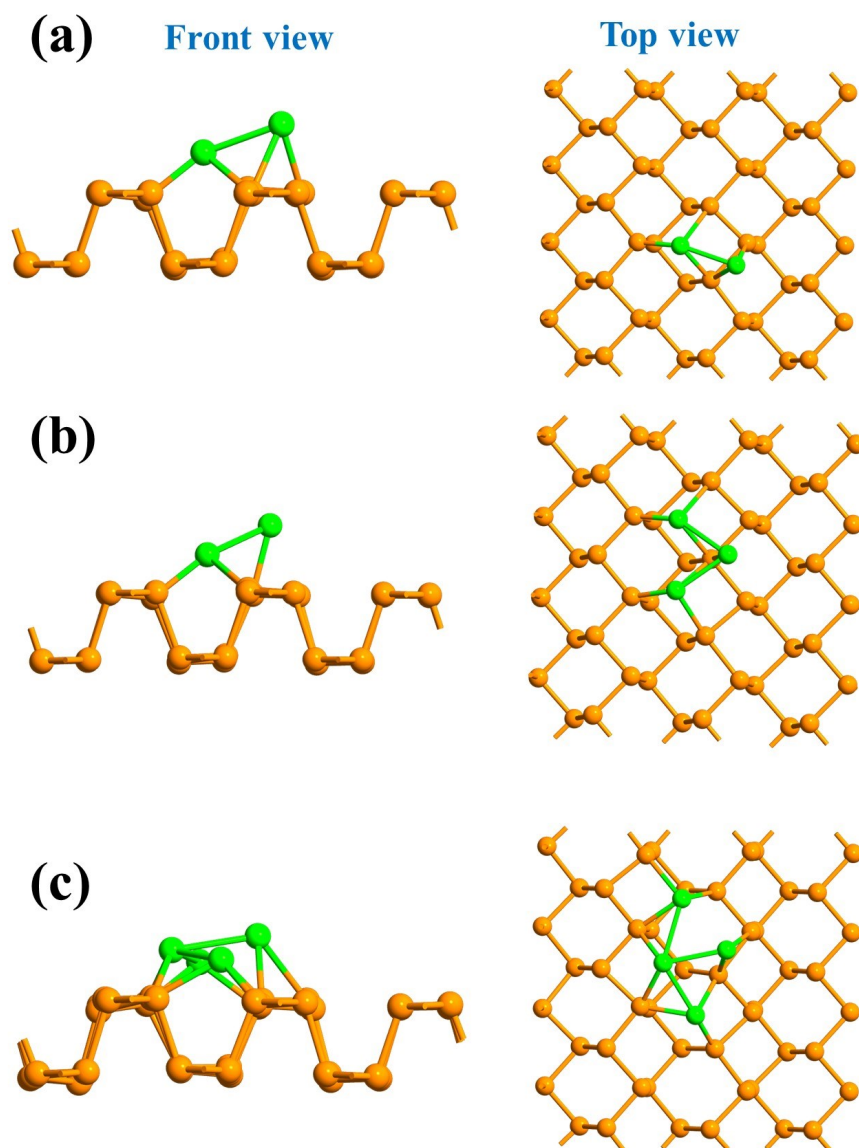

Figure S1. The most stable configuration of different number of Pt on the phosphorene. (a) 2 atoms of Pt. (b) 3 atoms of Pt. (c) 4 atoms of Pt.

Table S 2. The adsorption energy of Methanol on the the different number of Pt- decorated Phosphorene surface.

| Number of Pt                    | 1      | 2     | 3     | 4     |
|---------------------------------|--------|-------|-------|-------|
| Methanol adsorption energy (eV) | -0.908 | -2.43 | -0.97 | -1.28 |

**(a)** Front view

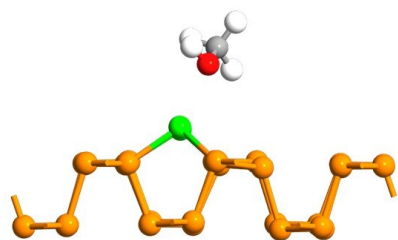

Top view

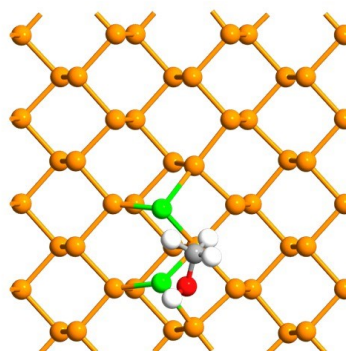

**(b)**

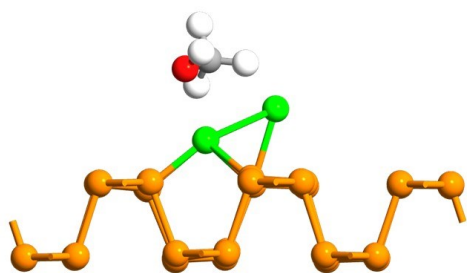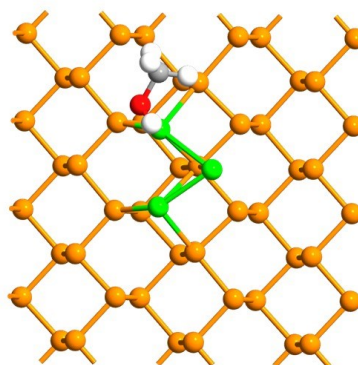

**(c)**

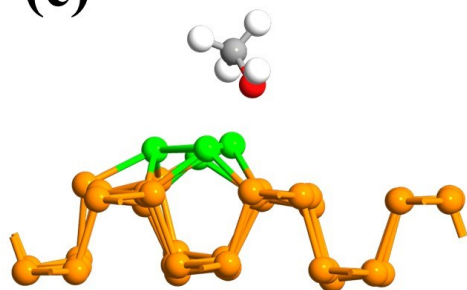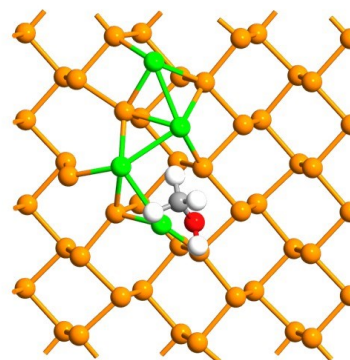

Figure S2. The most favorable adsorption of methanol upon different number of Pt- decorated phosphorene. (a) 2 atoms of Pt. (b) 3 atoms of Pt. (c) 4 atoms of Pt.
